# Supplementary material for: Genomic and Phenotypic Analysis of Multidrug-Resistant Acinetobacter baumannii Clinical Isolates Carrying Different Types of CRISPR/Cas Systems
Source: Pathogens. 2021 Feb 13;10(2):205. doi: 10.3390/pathogens10020205 (PMC7918744; doi:10.3390/pathogens10020205)
Supplement: Supplementary file 1 [file pathogens-10-00205-s001.zip › tables_suppl_R1.xlsx]

## Sheet: TableS1
Table S1. cgMLST profiles for the isolates studied (pubMLST.org)
Sample	ACICU_RS00005	ACICU_RS00010	ACICU_RS00015	ACICU_RS00020	ACICU_RS00025	ACICU_RS00030	ACICU_RS00035	ACICU_RS00040	ACICU_RS00045	ACICU_RS00050	ACICU_RS00055	ACICU_RS00065	ACICU_RS00070	ACICU_RS00075	ACICU_RS00085	ACICU_RS00090	ACICU_RS00095	ACICU_RS00100	ACICU_RS00115	ACICU_RS00125	ACICU_RS00130	ACICU_RS00135	ACICU_RS00140	ACICU_RS00145	ACICU_RS00150	ACICU_RS00155	ACICU_RS00165	ACICU_RS00170	ACICU_RS00175	ACICU_RS00180	ACICU_RS00185	ACICU_RS00190	ACICU_RS00195	ACICU_RS00200	ACICU_RS00235	ACICU_RS00240	ACICU_RS00250	ACICU_RS00255	ACICU_RS00260	ACICU_RS00265	ACICU_RS00270	ACICU_RS00275	ACICU_RS00280	ACICU_RS00285	ACICU_RS00290	ACICU_RS00295	ACICU_RS00300	ACICU_RS00305	ACICU_RS00310
CriePir33	5	7	7	7	7	1	3	1	7	7	3	8	5	6	7	N	7	7	7	7	6	2	7	7	2	7	7	2	6	7	2	6	7	7	7	5	8	8	8	8	7	8	8	8	8	1	8	8	2
CriePir87	2	240	11	11	11	1	1	1	12	12	1	11	2	10	242	213	12	12	11	12	10	8	12+	87	3	69	66	25	63	67	2	9	78	59	1	1	104	85	170	113	73	21	6	285	197	239	206	39	3
CriePir158	3	47	8	8	8	2	1	1	17	8	2	9	1	7	8	7	8	8	8	8	7	6	217+	8	2	8	8	2	7	8	3	7	8	8	8	7	9	9	9	17	15	9	9	9	9	8	9	8	4
CriePir168	3	4	4	4	4	2	1	1	4	136	1	4	4	4	4	4	4	4	4	4	4	3	4	4	1	4	4	2	3	4	2	3	4	4	6	6	7	7	7	7	6	7	117	53	7	7	7	7	2
CriePir221	5	7	7	7	7	1	3	1	7	7	3	8	5	6	7	N	7	7	7	7	6	2	7	7	2	7	7	2	6	7	2	6	7	7	7	5	8	8	8	8	7	N	8	8	N	6	6	6	3
CriePir298	2	2	2	2	2	2	1	1	2	2	1	2	2	2	2	2	2	2	2	140	2	2	2	2	2	2	2	2	2	2	2	2	2	2	2	2	2	2	2	2	2	2	47	59	56	51	58	3	21
CriePir299	4	6	6	6	6	1	2	1	6	6	2	6	3	3	6	6	6	6	12	6	1	5	6+	6	3	6	6	5	5	6	2	5	6	6	5	5	6	6	6	6	5	6	6	6	6	6	6	6	3
CriePir302	2	12	11	11	11	1	1	1	68	86	2	18	3	39	81	77	74	54	46	139	13	8	78	29	2	55	80	2	53	59	2	7	68	49	4	4	93	57	66	N	19	10	12	11	10	11	12	9	5
CriePir306	2	12	11	11	11	1	1	1	12	12	1	11	2	10	12	11	12	12	11	12	10	8	12+	12	6	19	19	10	16	17	2	13	16	14	1	1	4	4	4	4	2	4	4	54	4	41	4	4	2
CriePir307	20	58	39	33	35	1	1	1	78	N	1	31	1	25	40	35	37	28	27	101	18	10	41	42	15	34	67-	2	28	N	9	8	37	22	2	5	N	6	11	N	2	2	2	70	69	64	117	9	2
CriePir308	4	6	6	6	6	1	2	1	6	6	2	6	3	3	6	6	6	6	12	6	1	5	6+	6	3	6	6	5	5	6	2	5	6	6	5	5	6	6	6	6	5	6	6	6	6	6	6	6	3
CriePir309	3	85	138	31	53	1	1	1	50	63	1	45	1	61	164	58	57	42	12	31	22	28	60	60	4	47	65	6	39	46	5	10	47	12	5	27	56	33	51	38	39	47	57	264	228	236	111	55	8
N - indicates novel allele variant not present in the database; 0? - locus is missing; "-" - allele is partially covered
[truncated: 2,341 more columns]

## Sheet: TableS2
Table S2. The numbers and features of CRISPR spacers found in A. baumannii isolates from multidisciplinary medical center in Moscow, Russia during the period of 2017-2019
Strain	Organism	Sequence	Sequence_basename	Duplicated_Spacers	CRISPR_Id	CRISPR_Start	CRISPR_End	CRISPR_Length	Potential_Orientation (AT%)	CRISPRDirection	Consensus_Repeat	Repeat_ID (CRISPRdb)	Nb_CRISPRs_with_same_Repeat (CRISPRdb)	Repeat_Length	Spacers_Nb	Mean_size_Spacers	Standard_Deviation_Spacers	Nb_Repeats_matching_Consensus	Ratio_Repeats_match/TotalRepeat	Conservation_Repeats (% identity)	EBcons_Repeats	Conservation_Spacers (% identity)	EBcons_Spacers	Repeat_Length_plus_mean_size_Spacers	Ratio_Repeat/mean_Spacers_Length	CRISPR_found_in_DB (if sequence IDs are similar)	Evidence_Level
CriePir33	Acinetobacter baumannii	NODE_3_length_193179_cov_136,002	NODE_3_length_193179_cov_136	0	NODE_3_length_193179_cov_136_1	123311	123396	85	Unknown	Unknown	TCAGAAGAAGCTCGTGAAGCTGG	Unknown	0	23	1	40	0	1	0.5	95.6522	95.6522	100	100	63	0.575	0	1
CriePir33	Acinetobacter baumannii	NODE_5_length_179058_cov_156,558	NODE_5_length_179058_cov_156	0	NODE_5_length_179058_cov_156_1	43968	44052	84	Forward	Unknown	GCTTGTCTTGCGCCAAAGTTAAAA	Unknown	0	24	1	37	0	1	0.5	95.8333	95.8333	100	100	61	0.648649	0	1
CriePir33	Acinetobacter baumannii	NODE_7_length_154038_cov_144,666	NODE_7_length_154038_cov_144	0	NODE_7_length_154038_cov_144_1	52551	52633	82	Forward	Unknown	TCATCTTGCGAAAAAGTAAGAGATA	Unknown	0	25	1	33	0	1	0.5	96	96	100	100	58	0.757576	0	1
CriePir33	Acinetobacter baumannii	NODE_21_length_66916_cov_133,702	NODE_21_length_66916_cov_133	0	NODE_21_length_66916_cov_133_1	38685	38794	109	Forward	Unknown	GTCTTCTTGCGAAGCTTTAGCCGCTTCTCAGG	Unknown	0	32	1	46	0	1	0.5	96.875	96.875	100	100	78	0.695652	0	1
CriePir87	Acinetobacter baumannii	NODE_8_length_181740_cov_103,424	NODE_8_length_181740_cov_103	0	NODE_8_length_181740_cov_103_1	67384	67469	85	Unknown	Unknown	CCAGCTTCACGAGCCTCTTCTGA	Unknown	0	23	1	40	0	1	0.5	95.6522	95.6522	100	100	63	0.575	0	1
CriePir168	Acinetobacter baumannii	NODE_1_length_451554_cov_19,272186	NODE_1_length_451554_cov_19	0	NODE_1_length_451554_cov_19_1	392	477	85	Unknown	Unknown	CCAGCTTCACGAGCCTCTTCTGA	Unknown	0	23	1	40	0	1	0.5	95.6522	95.6522	100	100	63	0.575	0	1
CriePir168	Acinetobacter baumannii	NODE_2_length_386365_cov_21,293715	NODE_2_length_386365_cov_21	1	NODE_2_length_386365_cov_21_1	149576	153745	4169	Unknown	Unknown	TTTCTAAATGGCGTATGCCGCCATGAAC	Unknown	0	28	69	32.029	0.168995	64	0.914286	57.1429	93.1223	0	0	60.029	0.874208	0	4	CAS-TypeIF:begin=153877;end=162017:{sequenceID=NODE_2_length_386365_cov_21} : [cas6_TypeIF (153877,154488,-); csy3_TypeIF (154491,155504,-); csy2_TypeIF (155531,156415,-); csy1_TypeIF (156415,157665,-); cas3-cas2_TypeI
CriePir168	Acinetobacter baumannii	NODE_3_length_376000_cov_16,928468	NODE_3_length_376000_cov_16	0	NODE_3_length_376000_cov_16_1	315537	315639	102	Reverse	Unknown	GACTAAAGCTTCGCTAGAAGACGAGA	Unknown	0	26	1	51	0	1	0.5	96.1538	96.1538	100	100	77	0.509804	0	1
CriePir168	Acinetobacter baumannii	NODE_9_length_197366_cov_25,141220	NODE_9_length_197366_cov_25	0	NODE_9_length_197366_cov_25_1	123651	123737	86	Reverse	Unknown	AAGATTGATAATCTTTTAATTTTGGC	Unknown	0	26	1	35	0	2	1	100	100	100	100	61	0.742857	0	1
CriePir168	Acinetobacter baumannii	NODE_12_length_152128_cov_17,474872	NODE_12_length_152128_cov_17	0	NODE_12_length_152128_cov_17_1	7859	7999	140	Forward	Unknown	CCAAAGCTTTAGCCGCTTTGTCTTGCTCAGGTGGCGTTTTTT	Unknown	0	42	1	57	0	1	0.5	97.619	97.619	100	100	99	0.736842	0	1
CriePir168	Acinetobacter baumannii	NODE_29_length_1457_cov_755,697744	NODE_29_length_1457_cov_755	0	NODE_29_length_1457_cov_755_1	453	577	124	Reverse	Unknown	ATATGTGGACACTTACCTTGCAA	Unknown	0	23	2	28	5.65685	2	0.666667	69.5652	72.0519	40.625	53.125	51	0.821429	0	1
CriePir221	Acinetobacter baumannii	NODE_3_length_208455_cov_174,039956	NODE_3_length_208455_cov_174	0	NODE_3_length_208455_cov_174_1	169612	169721	109	Reverse	Unknown	CCTGAGAAGCGACTAAAGCTTCGCAAGAAGAC	Unknown	0	32	1	46	0	1	0.5	96.875	96.875	100	100	78	0.695652	0	1
CriePir221	Acinetobacter baumannii	NODE_4_length_198758_cov_176,667721	NODE_4_length_198758_cov_176	0	NODE_4_length_198758_cov_176_1	45323	45408	85	Unknown	Unknown	TCAGAAGAAGCTCGTGAAGCTGG	Unknown	0	23	1	40	0	1	0.5	95.6522	95.6522	100	100	63	0.575	0	1
CriePir221	Acinetobacter baumannii	NODE_7_length_176800_cov_189,967941	NODE_7_length_176800_cov_189	0	NODE_7_length_176800_cov_189_1	43284	43368	84	Forward	Unknown	GCTTGTCTTGCGCCAAAGTTAAAA	Unknown	0	24	1	37	0	1	0.5	95.8333	95.8333	100	100	61	0.648649	0	1
CriePir221	Acinetobacter baumannii	NODE_29_length_45298_cov_192,626552	NODE_29_length_45298_cov_192	0	NODE_29_length_45298_cov_192_1	41229	41311	82	Forward	Unknown	TCATCTTGCGAAAAAGTAAGAGATA	Unknown	0	25	1	33	0	1	0.5	96	96	100	100	58	0.757576	0	1
CriePir298	Acinetobacter baumannii	NODE_2_length_324609_cov_99,249342	NODE_2_length_324609_cov_99	0	NODE_2_length_324609_cov_99_1	183085	184976	1891	Forward	Unknown	TTTCTAAATGGCGTATGCCGCCATGAAC	Unknown	0	28	31	32.0968	0.300537	27	0.84375	42.8571	85.7439	0	0	60.0968	0.872362	0	4
CriePir298	Acinetobacter baumannii	NODE_2_length_324609_cov_99,249342	NODE_2_length_324609_cov_99	1	NODE_2_length_324609_cov_99_2	185108	186215	1107	Reverse	Unknown	TTTCTAAATGGCGTATGCCGCCATGAAC	Unknown	0	28	18	32	0	19	1	100	100	0	0	60	0.875	0	4	CAS-TypeIF:begin=1011505;end=1019986:{sequenceID=1} : [cas1_TypeIF (1011505,1012452,+); cas3-cas2_TypeIF (1012809,1016183,+); csy1_TypeIF (1016199,1017449,+); csy2_TypeIF (1017449,1018333,+); csy3_TypeIF (1018359,1019372,+); cas6_TypeIF (1019375,1019986,+)]
CriePir302	Acinetobacter baumannii	NODE_1_length_461914_cov_105,997354	NODE_1_length_461914_cov_105	0	NODE_1_length_461914_cov_105_1	290677	290762	85	Unknown	Unknown	CCAGCTTCACGAGCCTCTTCTGA	Unknown	0	23	1	40	0	1	0.5	95.6522	95.6522	100	100	63	0.575	0	1
CriePir306	Acinetobacter baumannii	NODE_4_length_257447_cov_134,433736	NODE_4_length_257447_cov_134	0	NODE_4_length_257447_cov_134_1	138575	138659	84	Reverse	Unknown	TTTTAACTTTGGCGCAAGACAAGC	Unknown	0	24	1	37	0	1	0.5	95.8333	95.8333	100	100	61	0.648649	0	1
CriePir306	Acinetobacter baumannii	NODE_8_length_194298_cov_114,637402	NODE_8_length_194298_cov_114	0	NODE_8_length_194298_cov_114_1	127473	127572	99	Reverse	Unknown	TAAAGCTTCGCAAGAAGACGAGA	Unknown	0	23	1	54	0	2	1	100	100	100	100	77	0.425926	0	1
CriePir307	Acinetobacter baumannii	NODE_10_length_99696_cov_120,329279	NODE_10_length_99696_cov_120	0	NODE_10_length_99696_cov_120_1	54998	55084	86	Reverse	Unknown	AAGATTGATAATCTTTTAATTTTGGC	Unknown	0	26	1	35	0	1	0.5	96.1538	96.1538	100	100	61	0.742857	0	1
CriePir307	Acinetobacter baumannii	NODE_20_length_87355_cov_104,172662	NODE_20_length_87355_cov_104	0	NODE_20_length_87355_cov_104_1	81243	81406	163	Unknown	Unknown	CGGTTATCATTTTGCTGTTGTTG	Unknown	0	23	3	24	11.3578	1	0.25	47.8261	55.2109	13.5135	38.4299	47	0.958333	0	1
CriePir307	Acinetobacter baumannii	NODE_23_length_71494_cov_110,414323	NODE_23_length_71494_cov_110	0	NODE_23_length_71494_cov_110_1	1015	1128	113	Forward	Unknown	TCTCAGGACAAAGCGTTGCTTTGTTTATCCTCTTCC	Unknown	0	36	1	42	0	1	0.5	97.2222	97.2222	100	100	78	0.857143	0	1
CriePir307	Acinetobacter baumannii	NODE_28_length_62204_cov_109,957794	NODE_28_length_62204_cov_109	0	NODE_28_length_62204_cov_109_1	3708	4092	384	Forward	Unknown	TTTCTAAATCATCTATGCGATGAA	Unknown	0	24	6	36	0	3	0.428571	66.6667	75.8669	9.09091	8.96205	60	0.666667	0	3	CAS-TypeIF:begin=348;end=9733:{sequenceID=NODE_28_length_62204_cov_109} : [cas1_TypeIF (8780,9733,+); cas3-cas2_TypeIF (348,3584,-); cas6_TypeIF (8160,8768,+); csy2_TypeIF (6182,7066,+); csy3_TypeIF (7096,8157,+)]
CriePir307	Acinetobacter baumannii	NODE_28_length_62204_cov_109,957794	NODE_28_length_62204_cov_109	0	NODE_28_length_62204_cov_109_2	4192	4271	79	Reverse	Unknown	TTTCTAAATCATCTATGCGATGAA	Unknown	0	24	1	32	0	0	0	75	75	100	100	56	0.75	0	1
CriePir307	Acinetobacter baumannii	NODE_28_length_62204_cov_109,957794	NODE_28_length_62204_cov_109	0	NODE_28_length_62204_cov_109_3	9831	14179	4348	Forward	Unknown	GTTCTTCATCGCATAGATGATTTAGAAA	Unknown	0	28	72	32.0139	0.117851	72	0.986301	92.8571	99.2541	0	0	60.0139	0.87462	0	4
CriePir307	Acinetobacter baumannii	NODE_44_length_25797_cov_209,117569	NODE_44_length_25797_cov_209	0	NODE_44_length_25797_cov_209_1	4660	4755	95	Forward	Unknown	GTCATAGTTAGTAGTCAATCCGTCATAGTTAA	Unknown	0	32	1	32	0	1	0.5	96.875	96.875	100	100	64	1	0	1
CriePir308	Acinetobacter baumannii	NODE_7_length_164197_cov_101,547699	NODE_7_length_164197_cov_101	0	NODE_7_length_164197_cov_101_1	50691	50776	85	Unknown	Unknown	CCAGCTTCACGAGCCTCTTCTGA	Unknown	0	23	1	40	0	1	0.5	95.6522	95.6522	100	100	63	0.575	0	1
CriePir309	Acinetobacter baumannii	NODE_1_length_160734_cov_132,580697	NODE_1_length_160734_cov_132	0	NODE_1_length_160734_cov_132_1	99863	100490	627	Unknown	Unknown	GTTCATGGCGGCATACGCCATTTAGAAA	Unknown	0	28	10	32	0	6	0.545455	57.1429	75.8022	0	0	60	0.875	0	4
CriePir309	Acinetobacter baumannii	NODE_24_length_53034_cov_141,881547	NODE_24_length_53034_cov_141	0	NODE_24_length_53034_cov_141_1	47260	47707	447	Forward	Unknown	TTTCTAAGCTGCCTATACGGCAGTGAAC	Unknown	0	28	7	32	0	6	0.75	60.7143	78.6457	4.54545	0	60	0.875	0	4
Isolates possessing apparently functional CRISPR/Cas system are shown in bold

## Sheet: TableS3
Table S3. A. baumannii reference isolates.
	Isolate	GenBank Accession Number	Reference
No CRISPR/No Cas
1	A. baumannii 1656-2	CP001921.1	Park JY, Kim S, Kim SM, Cha SH, Lim SK, Kim J. Complete genome sequence of multidrug-resistant Acinetobacter baumannii strain 1656-2, which forms sturdy biofilm. J Bacteriol. 2011;193(22):6393-6394. doi:10.1128/JB.06109-11
2	A. baumannii ACICU	CP000863.1	Iacono M, Villa L, Fortini D, et al. Whole-genome pyrosequencing of an epidemic multidrug-resistant Acinetobacter baumannii strain belonging to the European clone II group. Antimicrob Agents Chemother. 2008;52(7):2616-2625. doi:10.1128/AAC.01643-07
3	A. baumannii strain 11510	CP018861.2	-
4	A. baumannii strain 6507	CP045528.1	-
5	A. baumannii strain 810CP	CP026338.1	-
6	A. baumannii strain abA1	CP060732.1	-
7	A. baumannii strain ABUH763	CP035051.1	-
8	A. baumannii strain AC29	CP007535.2	Lean SS, Yeo CC, Suhaili Z, Thong KL. Comparative Genomics of Two ST 195 Carbapenem-Resistant Acinetobacter baumannii with Different Susceptibility to Polymyxin Revealed Underlying Resistance Mechanism. Front Microbiol. 2016;6:1445. Published 2016 Jan 5. doi:10.3389/fmicb.2015.01445
9	A. baumannii strain ATCC BAA-1790	CP042841.1	-
10	A. baumannii strain AYP-A2	CP024124.1	-
11	A. baumannii strain KAB02	CP017644.1	-
12	A. baumannii strain KAB05	CP017650.1	-
13	A. baumannii strain KAB06	CP017652.1	-
14	A. baumannii strain KAB07	CP017654.1	-
15	A. baumannii strain KAB08	CP017656.1	-
16	A. baumannii strain MDR-CQ	CP019114.1	-
17	A. baumannii strain MDR-UNC	CP031444.1	-
18	A. baumannii strain VB23193	CP035672.1	-
19	A. baumannii strain TG22182	CP039993.1	-
20	A. baumannii strain USA2	CP020592.1	-
21	A. baumannii PKAB07	CP006963.1	Saranathan R, Tomar A, Sudhakar P, Arunkumar KP, Prashanth K. Draft Genome Sequence of a Multidrug-Resistant Acinetobacter baumannii PKAB07 Clinical Strain from India Belonging to Sequence Type 195. Genome Announc. 2014;2(2):e00184-14. Published 2014 Mar 20. doi:10.1128/genomeA.00184-14
22	A. baumannii TYTH-1	CP003856.1	Liou ML, Liu CC, Lu CW, et al. Genome sequence of Acinetobacter baumannii TYTH-1. J Bacteriol. 2012;194(24):6974. doi:10.1128/JB.01860-12
23	A. baumannii strain VB473	CP050388.1	-
24	A. baumannii strain XDR-BJ83	CP018421.1	-
25	A. baumannii strain XH859	CP014539.1	-
26	A. baumannii strain YU-R612	CP014215.1	Lee Y, D'Souza R, Yong D, Lee K. Prediction of Putative Resistance Islands in a Carbapenem-Resistant Acinetobacter baumannii Global Clone 2 Clinical Isolate. Ann Lab Med. 2016;36(4):320-324. doi:10.3343/alm.2016.36.4.320
27	A. baumannii strain ABUH773	CP035049.1	-
28	A. baumannii DU202	CP017152.1	Lee SY, Yun SH, Lee YG, et al. Proteogenomic characterization of antimicrobial resistance in extensively drug-resistant Acinetobacter baumannii DU202. J Antimicrob Chemother. 2014;69(6):1483-1491. doi:10.1093/jac/dku008
29	A. baumannii strain AB048	CP037870.1	Fernando DM, Khan IU, Patidar R, et al. Isolation and Characterization of Acinetobacter baumannii Recovered from Campylobacter Selective Medium. Front Microbiol. 2016;7:1871. Published 2016 Nov 18. doi:10.3389/fmicb.2016.01871
30	A. baumannii strain G20AB010	CP066232.1	-
31	A. baumannii strain ZS3	CP021496.1	-
32	A. baumannii strain DT-Ab007	CP050914.1	-
33	A. baumannii strain KAB01	CP017642.1	-
34	A. baumannii strain EC	CP038262.1	Bitar I, Medvecky M, Gelbicova T, et al. Complete Nucleotide Sequences of mcr-4.3-Carrying Plasmids in Acinetobacter baumannii Sequence Type 345 of Human and Food Origin from the Czech Republic, the First Case in Europe. Antimicrob Agents Chemother. 2019;63(10):e01166-19. Published 2019 Sep 23. doi:10.1128/AAC.01166-19
35	A. baumannii strain VB1190	CP040047.1	-
36	A. baumannii strain VB31459	CP035930.1	-
37	A. baumannii MDR-ZJ06	CP001937.2	Zhou H, Zhang T, Yu D, et al. Genomic analysis of the multidrug-resistant Acinetobacter baumannii strain MDR-ZJ06 widely spread in China. Antimicrob Agents Chemother. 2011;55(10):4506-4512. doi:10.1128/AAC.01134-10
38	A. baumannii strain SSA6	CP020591.1	-
CRISPR/No Cas
39	A. baumannii AC12	CP007549.3	Lean SS, Yeo CC, Suhaili Z, Thong KL. Comparative Genomics of Two ST 195 Carbapenem-Resistant Acinetobacter baumannii with Different Susceptibility to Polymyxin Revealed Underlying Resistance Mechanism. Front Microbiol. 2016;6:1445. Published 2016 Jan 5. doi:10.3389/fmicb.2015.01445
40	A. baumannii AC30	CP007577.1	Lean SS, Yeo CC, Suhaili Z, Thong KL. Comparative Genomics of Two ST 195 Carbapenem-Resistant Acinetobacter baumannii with Different Susceptibility to Polymyxin Revealed Underlying Resistance Mechanism. Front Microbiol. 2016;6:1445. Published 2016 Jan 5. doi:10.3389/fmicb.2015.01445
41	A. baumannii ACICU	CP031380.1	-
42	A. baumannii BJAB07104	CP003846.1	Zhu L, Yan Z, Zhang Z, et al. Complete genome analysis of three Acinetobacter baumannii clinical isolates in China for insight into the diversification of drug resistance elements. PLoS One. 2013;8(6):e66584. Published 2013 Jun 24. doi:10.1371/journal.pone.0066584
43	A. baumannii BJAB0868	CP003849.1	Zhu L, Yan Z, Zhang Z, et al. Complete genome analysis of three Acinetobacter baumannii clinical isolates in China for insight into the diversification of drug resistance elements. PLoS One. 2013;8(6):e66584. Published 2013 Jun 24. doi:10.1371/journal.pone.0066584
44	A. baumannii isolate 09A16CRGN003B	CP034243.1	Boyd DA, Mataseje LF, Pelude L, et al. Results from the Canadian Nosocomial Infection Surveillance Program for detection of carbapenemase-producing Acinetobacter spp. in Canadian hospitals, 2010-16. J Antimicrob Chemother. 2019;74(2):315-320. doi:10.1093/jac/dky416
45	A. baumannii strain 10042	CP023026.1	-
46	A. baumannii strain 11A1213CRGN008	CP035186.1	Boyd DA, Mataseje LF, Pelude L, et al. Results from the Canadian Nosocomial Infection Surveillance Program for detection of carbapenemase-producing Acinetobacter spp. in Canadian hospitals, 2010-16. J Antimicrob Chemother. 2019;74(2):315-320. doi:10.1093/jac/dky416
47	A. baumannii strain A320 (RUH134)	CP032055.1	Blackwell GA, Nigro SJ, Hall RM. Evolution of AbGRI2-0, the Progenitor of the AbGRI2 Resistance Island in Global Clone 2 of Acinetobacter baumannii. Antimicrob Agents Chemother. 2015;60(3):1421-1429. Published 2015 Dec 14. doi:10.1128/AAC.02662-15
48	A. baumannii strain Ab4568	CP024613.1	-
49	A. baumannii strain Ab4653	CP024612.1	-
50	A. baumannii strain Ab4977	CP024611.1	-
51	A. baumannii strain Aba	CP030083.1	-
52	A. baumannii strain AbPK1	CP024576.1	-
53	A. baumannii strain ABUH793	CP035045.1	-
54	A. baumannii strain ABUH796	CP035043.1	-
55	A. baumannii strain AB030	CP009257.1	Loewen PC, Alsaadi Y, Fernando D, Kumar A. Genome Sequence of an Extremely Drug-Resistant Clinical Isolate of Acinetobacter baumannii Strain AB030. Genome Announc. 2014;2(5):e01035-14. Published 2014 Oct 16. doi:10.1128/genomeA.01035-14
56	A. baumannii strain AB34299	CP014291.1	-
57	A. baumannii strain AF-673	CP018256.1	-
58	A. baumannii strain AR_0102	CP027607.1	-
59	A. baumannii strain BAL062	LT594095.1	-
60	A. baumannii strain CFSAN093705	CP061525.1	-
61	A. baumannii strain CFSAN093706	CP061523.1	-
62	A. baumannii strain CFSAN093707	CP061521.1	-
63	A. baumannii strain CFSAN093708	CP061519.1	-
64	A. baumannii strain CFSAN093710	CP061514.1	-
65	A. baumannii strain CMC-CR-MDR-Ab4	CP016295.1	Rao J, Susanti D, Childress JC, et al. Tn2008-driven carbapenem resistance in Acinetobacter baumannii isolates from a period of increased incidence of infections in a Southwest Virginia hospital (USA). J Glob Antimicrob Resist. 2018;12:79-87. doi:10.1016/j.jgar.2017.08.017
66	A. baumannii strain CMC-CR-MDR-Ab66	CP016300.1	Rao J, Susanti D, Childress JC, et al. Tn2008-driven carbapenem resistance in Acinetobacter baumannii isolates from a period of increased incidence of infections in a Southwest Virginia hospital (USA). J Glob Antimicrob Resist. 2018;12:79-87. doi:10.1016/j.jgar.2017.08.017
67	A. baumannii strain CMC-MDR-Ab59	CP016298.1	Rao J, Susanti D, Childress JC, et al. Tn2008-driven carbapenem resistance in Acinetobacter baumannii isolates from a period of increased incidence of infections in a Southwest Virginia hospital (USA). J Glob Antimicrob Resist. 2018;12:79-87. doi:10.1016/j.jgar.2017.08.017
68	A. baumannii strain DA33098	CP029569.1	-
69	A. baumannii strain DT-Ab003	CP050916.1	-
70	A. baumannii strain DT-Ab020	CP050911.1	-
71	A. baumannii strain DT-Ab022	CP050907.1	-
72	A. baumannii strain DT-Ab057	CP050904.1	-
73	A. baumannii isolate SMC_Paed_Ab_BL01	CP025266.1	-
74	A. baumannii isolate 09A16CRGN0014	CP034242.1	Boyd DA, Mataseje LF, Pelude L, et al. Results from the Canadian Nosocomial Infection Surveillance Program for detection of carbapenemase-producing Acinetobacter spp. in Canadian hospitals, 2010-16. J Antimicrob Chemother. 2019;74(2):315-320. doi:10.1093/jac/dky416
75	A. baumannii strain HRAB-85	CP018143.1	-
76	A. baumannii strain KAB04	CP017648.1	-
77	A. baumannii strain KBN10P02143	CP013924.1	Lee YW, Choe H, Lee SH, et al. Complete genome of the multidrug-resistant Acinetobacter baumannii strain KBN10P02143 isolated from Korea. Mem Inst Oswaldo Cruz. 2016;111(5):355-358. doi:10.1590/0074-02760160034
78	A. baumannii strain MS14413	CP054302.1	-
79	A. baumannii strain ORAB01	CP015483.1	-
80	A. baumannii strain PB364	CP040425.1	-
81	A. baumannii strain PM1912235	CP050410.1	-
82	A. baumannii strain PM192696	CP050412.1	-
83	A. baumannii strain S1	CP026943.1	-
84	A. baumannii strain SAA14	CP020579.1	-
85	A. baumannii strain TG22627	CP039520.1	-
86	A. baumannii strain TG22653	CP039518.1	-
87	A. baumannii strain TP1	CP056784.2	Schooley RT, Biswas B, Gill JJ, et al. Development and Use of Personalized Bacteriophage-Based Therapeutic Cocktails To Treat a Patient with a Disseminated Resistant Acinetobacter baumannii Infection [published correction appears in Antimicrob Agents Chemother. 2018 Nov 26;62(12):]. Antimicrob Agents Chemother. 2017;61(10):e00954-17. Published 2017 Sep 22. doi:10.1128/AAC.00954-17
88	A. baumannii strain TP2	CP060011.1	Schooley RT, Biswas B, Gill JJ, et al. Development and Use of Personalized Bacteriophage-Based Therapeutic Cocktails To Treat a Patient with a Disseminated Resistant Acinetobacter baumannii Infection [published correction appears in Antimicrob Agents Chemother. 2018 Nov 26;62(12):]. Antimicrob Agents Chemother. 2017;61(10):e00954-17. Published 2017 Sep 22. doi:10.1128/AAC.00954-17
89	A. baumannii strain TP3	CP060013.1	Schooley RT, Biswas B, Gill JJ, et al. Development and Use of Personalized Bacteriophage-Based Therapeutic Cocktails To Treat a Patient with a Disseminated Resistant Acinetobacter baumannii Infection [published correction appears in Antimicrob Agents Chemother. 2018 Nov 26;62(12):]. Antimicrob Agents Chemother. 2017;61(10):e00954-17. Published 2017 Sep 22. doi:10.1128/AAC.00954-17
90	A. baumannii strain VB2139	CP050526.1	-
91	A. baumannii strain VB2181	CP050401.1	-
92	A. baumannii strain VB2200	CP050421.1	-
93	A. baumannii strain VB35575	CP040087.1	-
94	A. baumannii strain VB7036	CP050523.1	-
95	A. baumannii strain VB723	CP050390.1	-
96	A. baumannii strain XH386	CP010779.1	Fang Y, Quan J, Hua X, et al. Complete genome sequence of Acinetobacter baumannii XH386 (ST208), a multi-drug resistant bacteria isolated from pediatric hospital in China. Genom Data. 2015;7:269-274. Published 2015 Dec 19. doi:10.1016/j.gdata.2015.12.002
97	A. baumannii strain XH386	CP021326.1	-
98	A. baumannii strain XH731	CP021321.1	-
99	A. baumannii XH731	CP019217.1	-
100	A. baumannii strain XH906	CP023140.1	-
101	A. baumannii TCDC-AB0715	CP002522.2	Chen CC, Lin YC, Sheng WH, et al. Genome sequence of a dominant, multidrug-resistant Acinetobacter baumannii strain, TCDC-AB0715. J Bacteriol. 2011;193(9):2361-2362. doi:10.1128/JB.00244-11
102	A. baumannii MDR-TJ	CP003500.1	Gao F, Wang Y, Liu YJ, et al. Genome sequence of Acinetobacter baumannii MDR-TJ. J Bacteriol. 2011;193(9):2365-2366. doi:10.1128/JB.00226-11; Huang H, Yang ZL, Wu XM, et al. Complete genome sequence of Acinetobacter baumannii MDR-TJ and insights into its mechanism of antibiotic resistance. J Antimicrob Chemother. 2012;67(12):2825-2832. doi:10.1093/jac/dks327
103	A. baumannii strain 5845	CP023034.1	-
104	A. baumannii ATCC 17978	CP053098.1	-
105	A. baumannii ATCC 17978	CP000521.1	Smith MG, Gianoulis TA, Pukatzki S, et al. New insights into Acinetobacter baumannii pathogenesis revealed by high-density pyrosequencing and transposon mutagenesis. Genes Dev. 2007;21(5):601-614. doi:10.1101/gad.1510307
106	A. baumannii ATCC 17978 substr. PMR-Low	CP039023.2	-
107	A. baumannii strain A118	CP059039.1	-
108	A. baumannii strain A52	CP034092.1	Jia H, Sun Q, Ruan Z, Xie X. Characterization of a small plasmid carrying the carbapenem resistance gene blaOXA-72 from community-acquired Acinetobacter baumannii sequence type 880 in China. Infect Drug Resist. 2019;12:1545-1553. Published 2019 Jun 6. doi:10.2147/IDR.S202803
109	A. baumannii strain AB042	CP019034.1	Fernando DM, Chong P, Singh M, et al. Multi-omics approach to study global changes in a triclosan-resistant mutant strain of Acinetobacter baumannii ATCC 17978. Int J Antimicrob Agents. 2017;49(1):74-80. doi:10.1016/j.ijantimicag.2016.10.014
110	A. baumannii strain AB043	CP043910.1	-
111	A. baumannii strain AB046	CP037872.1	Fernando DM, Khan IU, Patidar R, et al. Isolation and Characterization of Acinetobacter baumannii Recovered from Campylobacter Selective Medium. Front Microbiol. 2016;7:1871. Published 2016 Nov 18. doi:10.3389/fmicb.2016.01871
112	A. baumannii strain AB053	CP037869.1	Fernando DM, Khan IU, Patidar R, et al. Isolation and Characterization of Acinetobacter baumannii Recovered from Campylobacter Selective Medium. Front Microbiol. 2016;7:1871. Published 2016 Nov 18. doi:10.3389/fmicb.2016.01871
113	A. baumannii strain Ab421_GEIH-2010	CP014266.1	Fernández-Cuenca F, Tomás-Carmona M, Caballero-Moyano F, et al. Actividad de 18 agentes antimicrobianos frente a aislados clínicos de Acinetobacter baumannii: segundo estudio nacional multicéntrico (proyecto GEIH-REIPI-Ab 2010) [In vitro activity of 18 antimicrobial agents against clinical isolates of Acinetobacter spp.: multicenter national study GEIH-REIPI-Ab 2010] [published correction appears…
114	A. baumannii strain ATCC 17978	CP059041.1	-
115	A. baumannii ATCC 17978-mff	CP012004.1	Weber BS, Ly PM, Irwin JN, Pukatzki S, Feldman MF. A multidrug resistance plasmid contains the molecular switch for type VI secretion in Acinetobacter baumannii. Proc Natl Acad Sci U S A. 2015;112(30):9442-9447. doi:10.1073/pnas.1502966112
116	A. baumannii strain ATCC 17978	CP018664.1	Fernando DM, Xu W, Loewen PC, Zhanel GG, Kumar A. Triclosan can select for an AdeIJK-overexpressing mutant of Acinetobacter baumannii ATCC 17978 that displays reduced susceptibility to multiple antibiotics. Antimicrob Agents Chemother. 2014;58(11):6424-6431. doi:10.1128/AAC.03074-14
117	A. baumannii strain CA-17	CP012587.1	-
118	A. baumannii BJAB0715	CP003847.1	Zhu L, Yan Z, Zhang Z, et al. Complete genome analysis of three Acinetobacter baumannii clinical isolates in China for insight into the diversification of drug resistance elements. PLoS One. 2013;8(6):e66584. Published 2013 Jun 24. doi:10.1371/journal.pone.0066584
119	A. baumannii D1279779	CP003967.2	Eijkelkamp BA, Stroeher UH, Hassan KA, Papadimitrious MS, Paulsen IT, Brown MH. Adherence and motility characteristics of clinical Acinetobacter baumannii isolates. FEMS Microbiol Lett. 2011;323(1):44-51. doi:10.1111/j.1574-6968.2011.02362.x
120	A. baumannii genome assembly R2090	LN868200.1	-
121	A. baumannii strain 29FS20	CP044519.1	-
122	A. baumannii strain 31FS3-2	CP044517.1	-
123	A. baumannii strain 6200	CP010397.1	-
124	A. baumannii strain AR_0052	CP027183.1	-
125	A. baumannii AR_0070	CP027178.1	-
126	A. baumannii strain AR_0078	CP026761.1	-
127	A. baumannii strain ACN21	CP038644.1	-
128	A. baumannii strain AB031	CP009256.1	Loewen PC, Alsaadi Y, Fernando D, Kumar A. Genome Sequence of a Tigecycline-Resistant Clinical Isolate of Acinetobacter baumannii Strain AB031 Obtained from a Bloodstream Infection. Genome Announc. 2014;2(5):e01036-14. Published 2014 Oct 16. doi:10.1128/genomeA.01036-14
129	A. baumannii strain Ab-D10a-a	CP051869.1	-
130	A. baumannii strain Ab-B004d-c	CP051875.1	-
131	A. baumannii strain DT01139C	CP053218.1	-
132	A. baumannii strain DT0544C	CP053215.1	-
133	A. baumannii strain AbBAS-1	CP065392.1	-
134	A. baumannii NCGM 237 DNA	AP013357.1	Tada T, Miyoshi-Akiyama T, Shimada K, Shimojima M, Kirikae T. Dissemination of 16S rRNA methylase ArmA-producing acinetobacter baumannii and emergence of OXA-72 carbapenemase coproducers in Japan. Antimicrob Agents Chemother. 2014;58(5):2916-2920. doi:10.1128/AAC.01212-13
135	A. baumannii strain VB33071	CP040084.1	-
136	A. baumannii strain TG60155	CP036283.1	-
137	A. baumannii strain N13-03449	CP043417.1	-
138	A. baumannii strain ATCC 17978	CP049363.1	-
139	A. baumannii strain 11A1213CRGN055	CP035185.1	Boyd DA, Mataseje LF, Pelude L, et al. Results from the Canadian Nosocomial Infection Surveillance Program for detection of carbapenemase-producing Acinetobacter spp. in Canadian hospitals, 2010-16. J Antimicrob Chemother. 2019;74(2):315-320. doi:10.1093/jac/dky416
140	A. baumannii strain 11A1213CRGN064	CP043419.1	Boyd DA, Mataseje LF, Pelude L, et al. Results from the Canadian Nosocomial Infection Surveillance Program for detection of carbapenemase-producing Acinetobacter spp. in Canadian hospitals, 2010-16. J Antimicrob Chemother. 2019;74(2):315-320. doi:10.1093/jac/dky416
141	A. baumannii strain 11A1314CRGN088	CP035184.1	Boyd DA, Mataseje LF, Pelude L, et al. Results from the Canadian Nosocomial Infection Surveillance Program for detection of carbapenemase-producing Acinetobacter spp. in Canadian hospitals, 2010-16. J Antimicrob Chemother. 2019;74(2):315-320. doi:10.1093/jac/dky416
142	A. baumannii strain 11A1314CRGN089	CP043418.1	Boyd DA, Mataseje LF, Pelude L, et al. Results from the Canadian Nosocomial Infection Surveillance Program for detection of carbapenemase-producing Acinetobacter spp. in Canadian hospitals, 2010-16. J Antimicrob Chemother. 2019;74(2):315-320. doi:10.1093/jac/dky416
143	A. baumannii strain 11A14CRGN003	CP035183.1	Boyd DA, Mataseje LF, Pelude L, et al. Results from the Canadian Nosocomial Infection Surveillance Program for detection of carbapenemase-producing Acinetobacter spp. in Canadian hospitals, 2010-16. J Antimicrob Chemother. 2019;74(2):315-320. doi:10.1093/jac/dky416
144	A. baumannii strain VB35435	CP040056.1	-
145	A. baumannii strain 2008S11-069	CP033516.1	-
146	A. baumannii strain PG20180064	CP043180.1	-
147	A. baumannii strain SP304	CP040080.1	-
148	A. baumannii strain Res13-Abat-PEA21-P4-01-A	CP062919.1	-
149	A. baumannii Ab04-mff	CP012006.1	Weber BS, Ly PM, Irwin JN, Pukatzki S, Feldman MF. A multidrug resistance plasmid contains the molecular switch for type VI secretion in Acinetobacter baumannii. Proc Natl Acad Sci U S A. 2015;112(30):9442-9447. doi:10.1073/pnas.1502966112
150	A. baumannii strain CIAT758	CP038500.1	-
151	A. baumannii strain LAC4	CP018677.1	-
152	A. baumannii strain PM193665	CP050415.1	-
153	A. baumannii strain PM194188	CP050425.1	-
154	A. baumannii strain PM194229	CP050432.1	-
155	A. baumannii strain WKA02	CP020598.1	-
156	A. baumannii LAC-4	CP007712.1	Ou HY, Kuang SN, He X, et al. Complete genome sequence of hypervirulent and outbreak-associated Acinetobacter baumannii strain LAC-4: epidemiology, resistance genetic determinants and potential virulence factors. Sci Rep. 2015;5:8643. Published 2015 Mar 2. doi:10.1038/srep08643
157	A. baumannii strain B8342	CP021342.1	Vijaykumar S, Balaji V, Biswas I. Complete Genome Sequence of Acinetobacter baumannii Strain B8342, a Motility-Positive Clinical Isolate. Genome Announc. 2015;3(4):e00925-15. Published 2015 Aug 20. doi:10.1128/genomeA.00925-15
158	A. baumannii strain 9201	CP023020.1	-
159	A. baumannii strain AB047	CP037871.1	Fernando DM, Khan IU, Patidar R, et al. Isolation and Characterization of Acinetobacter baumannii Recovered from Campylobacter Selective Medium. Front Microbiol. 2016;7:1871. Published 2016 Nov 18. doi:10.3389/fmicb.2016.01871
160	A. baumannii strain VB35179	CP040053.1	-
161	A. baumannii strain G20AB007	CP066237.1	-
162	A. baumannii strain G20AB011	CP066229.1	-
163	A. baumannii strain G20AB009	CP066235.1	-
164	A. baumannii strain PR07	CP012035.1	-
165	A. baumannii strain XH858	CP014528.1	-
166	A. baumannii strain J9	CP041587.1	-
167	A. baumannii strain K09-14	CP043953.1	-
168	A. baumannii strain SD	CP064292.1	-
169	A. baumannii OCU_Ac16a DNA	AP023077.1	-
170	A. baumannii strain TG29392	CP039930.1	-
171	A. baumannii strain TG31302	CP039343.1	-
172	A. baumannii strain TG31986	CP039341.1	-
173	A. baumannii strain WP8-W18-ESBL-11	AP022238.1	-
174	A. baumannii ZW85-1	CP006768.1	Wang X, Zhang Z, Hao Q, Wu J, Xiao J, Jing H. Complete Genome Sequence of Acinetobacter baumannii ZW85-1. Genome Announc. 2014;2(1):e01083-13. Published 2014 Jan 23. doi:10.1128/genomeA.01083-13
175	A. baumannii strain XH1344	CP061541.1	-
176	A. baumannii strain 7847	CP023031.1	-
177	A. baumannii SDF	CU468230.2	Vallenet D, Nordmann P, Barbe V, et al. Comparative analysis of Acinetobacters: three genomes for three lifestyles. PLoS One. 2008;3(3):e1805. Published 2008 Mar 19. doi:10.1371/journal.pone.0001805
178	A. baumannii strain WPB103	CP034427.1	-
179	A. baumannii strain CFSAN093709	CP061517.1	-
180	A. baumannii strain EH	CP038258.1	Bitar I, Medvecky M, Gelbicova T, et al. Complete Nucleotide Sequences of mcr-4.3-Carrying Plasmids in Acinetobacter baumannii Sequence Type 345 of Human and Food Origin from the Czech Republic, the First Case in Europe. Antimicrob Agents Chemother. 2019;63(10):e01166-19. Published 2019 Sep 23. doi:10.1128/AAC.01166-19
181	A. baumannii strain AbCAN2	CP045428.1	-
182	A. baumannii strain XH856	CP014541.1	-
183	A. baumannii strain ABF9692	CP048827.1	-
184	A. baumannii strain ABNIH28	CP026125.1	-
185	A. baumannii strain CAM180-1	CP044356.1	-
186	A. baumannii strain B8342	CP021342.1	Vijaykumar S, Balaji V, Biswas I. Complete Genome Sequence of Acinetobacter baumannii Strain B8342, a Motility-Positive Clinical Isolate. Genome Announc. 2015;3(4):e00925-15. Published 2015 Aug 20. doi:10.1128/genomeA.00925-15
187	A. baumannii CUVET-MIC596	CP041148.1	-
188	A. baumannii strain MRSN15313	CP033869.1	-
189	A. baumannii strain NCIMB 8209	CP028138.1	-
190	A. baumannii strain 36-1512	CP059386.1	-
191	A. baumannii strain IOMTU 433	AP014649.1	Tada T, Miyoshi-Akiyama T, Shimada K, et al. Dissemination of clonal complex 2 Acinetobacter baumannii strains co-producing carbapenemases and 16S rRNA methylase ArmA in Vietnam. BMC Infect Dis. 2015;15:433. Published 2015 Oct 15. doi:10.1186/s12879-015-1171-x
192	A. baumannii strain XH857	CP014540.1	-
193	A. baumannii strain KAB03	CP017646.1	-
194	A. baumannii CR17	HG977526.1	-
195	A. baumannii CS01	HG977522.1	-
196	A. baumannii strain XH860	CP014538.1	-
197	A. baumannii strain XYAB2018	CP060285.1	-
198	A. baumannii strain VB16141	CP040050.1	-
199	A. baumannii strain VB2107	CP051474.1	-
200	A. baumannii strain VB958	CP040040.1	-
CRISPR/Cas Type I-F1
201	A. baumannii strain 9102	CP023029.1	-
202	A. baumannii AB307-0294	CP001172.2	-
203	A. baumannii strain 11W359501	CP041035.1	-
204	A. baumannii strain 5457	CP045541.1	-
205	A. baumannii strain 7804	CP022283.1	-
206	A. baumannii R2091	LN997846.1	-
207	A. baumannii strain A1	CP010781.1	-
208	A. baumannii AB0057	CP001182.2	Adams MD, Goglin K, Molyneaux N, et al. Comparative genome sequence analysis of multidrug-resistant A. baumannii. J Bacteriol. 2008;190(24):8053-8064. doi:10.1128/JB.00834-08
209	A. baumannii strain A85	CP021782.1	-
210	A. baumannii strain AB5075-UW	CP008706.1	-
211	A. baumannii CIP70.10	LN865143.1	-
212	A. baumannii strain AR_0083	CP027528.1	-
213	A. baumannii strain AR_0088	CP027530.1	-
214	A. baumannii strain D36	CP012952.1	-
215	A. baumannii strain DA33382	CP030106.1	-
216	A. baumannii strain HWBA8	CP020597.1	-
217	A. baumannii strain NCTC13421	LS483472.1	-
218	A. baumannii strain P7774	CP040259.1	-
219	A. baumannii strain USA15	CP020595.1	-
220	A. baumannii strain VB2486	CP050403.1	-
221	A. baumannii strain VB82	CP050385.1	-
222	A. baumannii strain WCHAB005078	CP027246.2	-
223	A. baumannii strain UPAB1	CP032215.1	-
224	A. baumannii strain E47	CP042556.1	-
225	A. baumannii strain A388	CP024418.1	-
226	A. baumannii strain DS002	CP027704.1	-
227	A. baumanniistr. AYE	CU459141.1	Vallenet D, Nordmann P, Barbe V, et al. Comparative analysis of Acinetobacters: three genomes for three lifestyles. PLoS One. 2008;3(3):e1805. Published 2008 Mar 19. doi:10.1371/journal.pone.0001805
228	A. baumannii AB307-0294	CP001172.2	Adams MD, Goglin K, Molyneaux N, et al. Comparative genome sequence analysis of multidrug-resistant A. baumannii. J Bacteriol. 2008;190(24):8053-8064. doi:10.1128/JB.00834-08
CRISPR/Cas Type I-F2
229	A. baumannii strain 7835	CP033243.1	-
230	A. baumannii strain AbH12O-A2	CP009534.1	Merino M, Alvarez-Fraga L, Gómez MJ, et al. Complete Genome Sequence of the MultiresistantA. baumannii Strain AbH12O-A2, Isolated during a Large Outbreak in Spain. Genome Announc. 2014;2(6):e01182-14. Published 2014 Nov 13. doi:10.1128/genomeA.01182-14
231	A. baumannii strain AF-401	CP018254.1	-
232	A. baumannii strain AR_0101	CP027611.1	-
233	A. baumannii strain AR_0063	CP026711.1	-
234	A. baumannii strain ab736	CP015121.1	-
235	A. baumannii strain ATCC 19606	CP046654.1	-
236	A. baumannii strain ATCC 19606	CP045110.1	-
237	A. baumannii strain XL380	CP046536.1	-
238	A. baumannii strain B8300	CP021347.1	Vijaykumar S, Balaji V, Biswas I. Complete Genome Sequence of A. baumannii Strain B8300, Which Displays High Twitching Motility. Genome Announc. 2015;3(4):e00956-15. Published 2015 Aug 20. doi:10.1128/genomeA.00956-15
239	A. baumannii strain Ab-C102	CP051862.1	-
240	A. baumannii strain A1296	CP018332.1	-
241	A. baumannii strain FDAARGOS_533	CP033768.1	-
242	A. baumannii strain 3207	CP015364.1	Castro-Jaimes S, Salgado-Camargo AD, Graña-Miraglia L, et al. Complete Genome Sequence of a Multidrug-Resistant Acinetobacter baumannii Isolate Obtained from a Mexican Hospital (Sequence Type 422). Genome Announc. 2016;4(3):e00583-16. Published 2016 Jun 23. doi:10.1128/genomeA.00583-16

## Sheet: TableS4
Table S4. Differences in virulence factor frequencies among the Acinetobacter baumannii isolates with different CRISPR/Cas systems.
	abaI	abaR	bap	basH	bauA	bfmR
1	No CRISPR/No Cas > CRISPR/No Cas, p = 0.0336	ns	No CRISPR/No Cas > CRISPR/No Cas, p = 0.0001	No CRISPR/No Cas > CRISPR/No Cas, p = 0.0208	No CRISPR/No Cas > CRISPR/No Cas, p = 0.0069	No CRISPR/No Cas ˂ CRISPR/No Cas, p = 0.0342
2	ns	ns	No CRISPR/No Cas > CRISPR/Cas Type I-F1, p < 0.00001	ns	No CRISPR/No Cas > CRISPR/Cas Type I-F1, p < 0.00001	ns
3	No CRISPR/No Cas > CRISPR/Cas Type I-F2, p = 0.0032	No CRISPR/No Cas > CRISPR/Cas Type I-F2, p = 0.0214	No CRISPR/No Cas > CRISPR/Cas Type I-F2, p = 0.0133	ns	No CRISPR/No Cas > CRISPR/Cas Type I-F2, p = 0.0001	ns
4	ns	ns	CRISPR/No Cas > CRISPR/Cas Type I-F1, p < 0.00001	CRISPR/No Cas ˂ CRISPR/Cas Type I-F1, p = 0.0169	CRISPR/No Cas > CRISPR/Cas Type I-F1, p < 0.00001	ns
5	ns	ns	ns	ns	CRISPR/No Cas > CRISPR/Cas Type I-F2, p = 0.0059	ns
6	ns	CRISPR/Cas Type I-F1 > CRISPR/Cas Type I-F2, p = 0.0313	CRISPR/Cas Type I-F1 ˂ CRISPR/Cas Type I-F2, p < 0.00001	ns	CRISPR/Cas Type I-F1 ˂ CRISPR/Cas Type I-F2, p = 0.0113	ns
Notes:
· abaI ‑ N-acyl-L-homoserine lactone synthetase;
· abaR ‑ DNA-binding HTH domain-containing protein;
· bap ‑ biofilm-associated protein;
· basH ‑ non-ribosomal peptide biosynthesis thioesterase BasH;
· bauA ‑ TonB-dependent siderophore receptor BauA;
· bfmR ‑ biofilm-controlling response regulator.
Ns – not significant.
